# Supplementary material for: Molecular Characterization and Phylogeography of Equine Influenza H3N8 Detected in Donkeys in Nigeria and Selection of Strains from Africa
Source: Research Square preprint supplement (doi:10.21203/rs.3.rs-7466103/v1), 2025-09-03
Supplement: Supplementary file 2 [file 45fd7e667a44d82e51a8aac2.docx]

Other amino acid residue substitutions recorded in the viral proteins include. PB2 (I63G,Y64D,T82A,S83R,Y684R,T685G,R703S,G704P), PB1 (E1A, .780G) and NS1-NEP (I129T, R130H, T153V, T154V) respectively. PA, MP and NP have no mutation in the viral proteins.
