# Supplementary material for: Molecular Characterization and Phylogeography of Equine Influenza H3N8 Detected in Donkeys in Nigeria and Selection of Strains from Africa
Source: Research Square preprint supplement (doi:10.21203/rs.3.rs-7466103/v1), 2025-09-03
Supplement: Supplementary file 3 [file 6f01011efd00c19f8fc9f426.docx]

Supplementary table 1: Putative N-glycosylation sites by position for HA in some selected Fc-1

**Position in alignment 6 16 23 37 53 68 78 118 180 238 300 436 498**

**A/equine/Ebonyi/Nigeria/249/2022**  N . . . . . . N . N . N .

**A/equine/Ebonyi/Nigeria/250/2022** N . . . . . . N . N . N .

(A/equine/South N N . . . . . N . N . N .

(A/equine/Ohio/1/2003) . . N N N N N . N N . N .

(A/equine/Curico/RO3B/2018) . . N N N N . . N . N . N

(A/equine/Santiago/TT11A/2018) . . N N N N . . N . N . N

(A/donkey/Nigeria/VRD19_ZM20_2019) . . N N N N . . N . N . N

(A/equine/Georgia/121362-16/2016) . . N N N N N . N . N . N

(A/equine/Tennessee/27A/2014) . . N N N N N . N . N . N

(A/equine/Texas/1/2020) . . N N N N . . N . N . N

(A/equine/Missouri/1/2022) . . N N N N . . N . N . N

(A/equine/Florida/2/2022) . . N N N N . . N . N . N

**Legend:** N means N-linked glycosylation and . means no N-linked glycosylation

Supplementary table 2: Putative N-glycosylation sites by position for NA in some selected Fc-1

**Position in alignment 7 38 39 47 54 67 68 79 84 144 207 268 293 398**

**A/equine/Ebonyi/Nigeria/249/2022** . . . . . . . . . . . . . .

**A/equine/Ebonyi/Nigeria/250/2022**  . . . . . . . . . . . . . .

(A/equine/03/South Africa . . . . . . . N . . . . . .

(A/equine/Ohio/1/2003) . . N . N N . N N N . . N N

(A/equine/Curico/RO3B/2018) . . . . . . . . . . . . .

(A/equine/Santiago/TT11A/2018) . . . . . . . . . . . . . .

(A/donkey/Nigeria/VRD19_ZM20_5/2019) . . . . . . . . . . . . . .

(A/equine/Georgia/121362-16/2016) . . . . . . . . . . . . . .

(A/equine/Tennessee/27A/2014) N N . N . . N . . . . . N N

(A/equine/Texas/1/2020) . . . . . . . . . . . . . .

(A/equine/Missouri/1/2022) . . . . . . . . . . . . . .

(A/equine/Florida/2/2022) . . . . . . . . . . . . . .

**Legend:** N means N-linked glycosylation and . means no N-linked glycosylation
