# Supplementary material for: Molecular Characterization and Phylogeography of Equine Influenza H3N8 Detected in Donkeys in Nigeria and Selection of Strains from Africa
Source: Research Square preprint supplement (doi:10.21203/rs.3.rs-7466103/v1), 2025-09-03
Supplement: Supplementary file 4 [file 92b5776337e4470d2fd6e987.xlsx]

## Sheet: bayes-data (2)
FROM	TO	BF	PP
ARG	SEN	3.234338242680958	0.19156024430871735
ARG	SAUDI	26.783330483613486	0.6624097723486951
ARG	NGR	40.678901235618435	0.8772345689510674
ARG	DEVO	1.8308671020446103	0.11826762909494726
USA	IRE	1.0355617078430928	0.07051637978900611
USA	CHIL	6.175454011298946	0.31149361465852304
UK	ALG	22.3967416912275223	0.64936146585230428
USA	WESTS	8.658113944236009	0.38811771238201
ITALY	JAPAN	3.0168470703374557	0.1810105496946141
ITALY	SEN	8.658113944236009	0.38811771238201
ITALY	ABA	3.199620936753322	0.18989450305385897
ITALY	WESTS	2.1289552658861495	0.13492504164353136
ITALY	MASS	21.319387867792837	0.6096612992781788
ITALY	TEX	2.0784792577628433	0.13214880621876737
FRAN	URU	10.05639487302116	0.42420877290394227
FRAN	POL	10.171250685746356	0.4269850083287063
FRAN	WESTS	5.231392159643789	0.27706829539144917
FRAN	TEX	2.717246083331787	0.1660188784008884
JAPAN	WESTS	10.61804319870283	0.4375347029428095
JAPAN	TEX	2.7390688712741755	0.167129372570794
MONTA	URU	2.7719123857926795	0.1687951138256524
MONTA	EGY	4.573558104376297	0.2509716823986674
MONTA	CHINA	5.496082398425609	0.2870627429205997
MONTA	UK	2.149236499998419	0.13603553581343697
IRE	WESTS	4.177109888759858	0.23431426985008327
IRE	WISCO	57.60630184277335	0.8084397556912826
MALAY	URU	2.5554093237062983	0.1576901721265963
IRE	EGY	22.87819467646678	0.6263187118267629
CHIL	WESTS	47.50281835315827	0.7767906718489728
URU	EGY	46.90032906028519	0.7745696835091616
URU	CHINA	4.1127061504570435	0.23153803442531928
URU	POL	12.173023421814062	0.4714047751249306
URU	WESTS	5.768299373855253	0.29705719044975015
URU	TEX	6.650213439587954	0.32759578012215435
EGY	CHINA	12.309363803520892	0.47418101054969464
PARIS	TEX	13.574264337061456	0.498611882287618
NIG	SEN	16.04021625830428	0.5402554136590783
SOK	TEX	40.6180814336053	0.7484730705163798
NGR	NIG	25.003253581100843	0.6468628539700166
SEN	SAUDI	114.38854375727128	0.8933925596890616
NIG	ABA	20.35205086250232	0.5985563575791227
SEN	MASS	4.533121559307135	0.249305941143809
SAUDI	DEVO	24569.720772226847	0.9994447529150472
POL	WESTS	5.661522461262007	0.29317046085508053
POL	TEX	3.5293099952340734	0.2054414214325375
ALG	WESTS	19.259620477411183	0.5852304275402554
FLOR	TEX	6.650213439587954	0.32759578012215435
FLOR	WASH	11.772461866044566	0.4630760688506385
FLOR	CHES	11.693836175097648	0.4614103275957801
WESTS	TEX	5.362816083308081	0.28206551915602446
WESTS	WISCO	3.7975437831057945	0.21765685730149917
TEX	WASH	9.762889047588544	0.4169905607995558
TEX	WISCO	0.2863062700215396	0.020544142143253747
TEX	CHES	8.066913622212281	0.3714602998334259
WASH	CHES	11.563868579976845	0.4586340921710161
